# Supplementary material for: Facile analysis of protein-protein interactions in living cells by enriched visualization of the p-body
Source: PubMed Central journal article supplement — BMB Rep. 2018 Oct 31;51(10):526–31. doi: 10.5483/BMBRep.2018.51.10.051 (PMC6235090; doi:10.5483/bmbrep.2018.51.10.051), 2018-10-31
Supplement: bmb-51-526_suppl.pdf [file bmb-51-526_suppl.pdf]

## Supplementary videos

**Video S1. Real-time imaging of rapamycin-induced FKBP12/FRB interaction on p-body.** HeLa cells were co-transfected with plasmids expressing EGFP-Dcp1a-FKBP12 and mCherry-FRB for 24 hrs. (A) Transfected cells were treated with 250 nM rapamycin at 46 seconds after imaging. Images were captured in every 3.8 seconds for 3 minutes. (B) Transfected cells were treated with 2.5 nM rapamycin at 75 seconds after imaging. Images were captured in every 6.2 seconds for 3 minutes.
